# Supplementary material for: Replaying the evolutionary tape to investigate subgenome dominance in allopolyploid Brassica napus
Source: PubMed Central journal article supplement — New Phytol. 2021 Jan 9;230(1):354–71. doi: 10.1111/nph.17137 (PMC7986222; doi:10.1111/nph.17137), 2021-01-09
Supplement: NPH-230-354-s002.pdf [file NPH-230-354-s002.pdf]

New Phytologist Supporting Information

**Title:** Replaying the evolutionary tape to investigate subgenome dominance in allopolyploid *Brassica napus*

**Authors:** Kevin A. Bird, Chad Niederhuth, Shujun Ou, Malia Gehan, J. Chris Pires, Zhiyong Xiong, Robert VanBuren, Patrick P. Edger

Acceptance date: 30 November 2020

**Figure S1.**

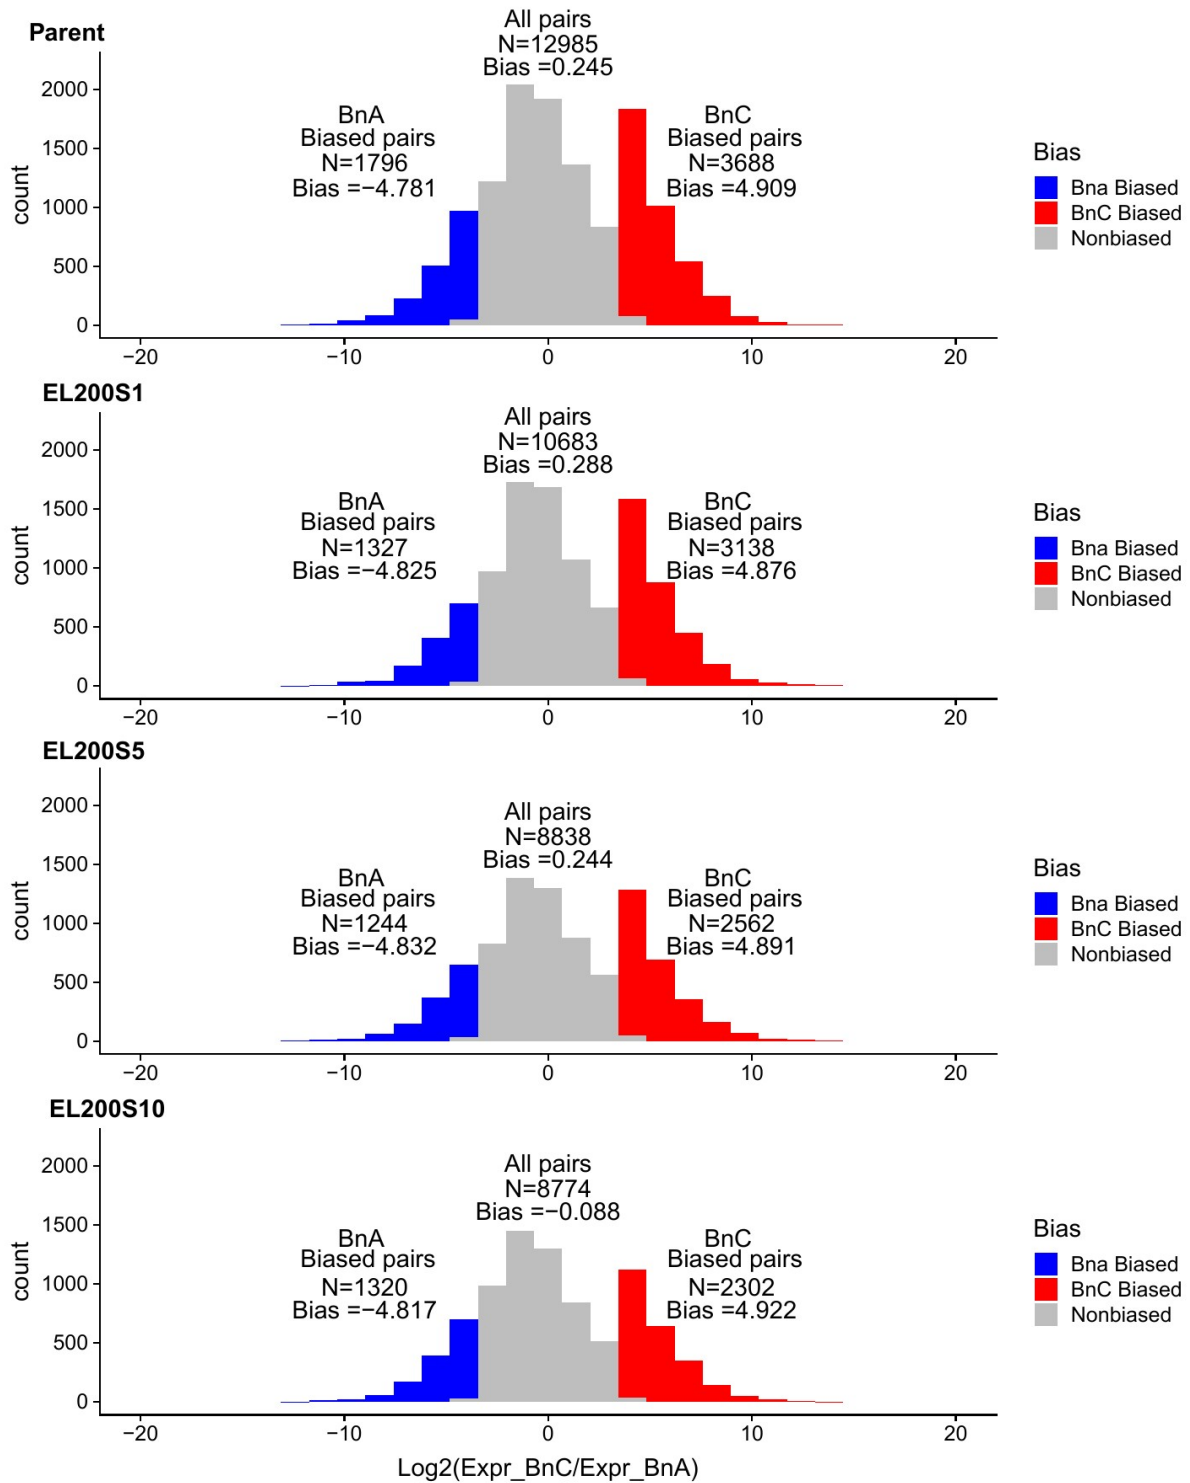

Figure S2

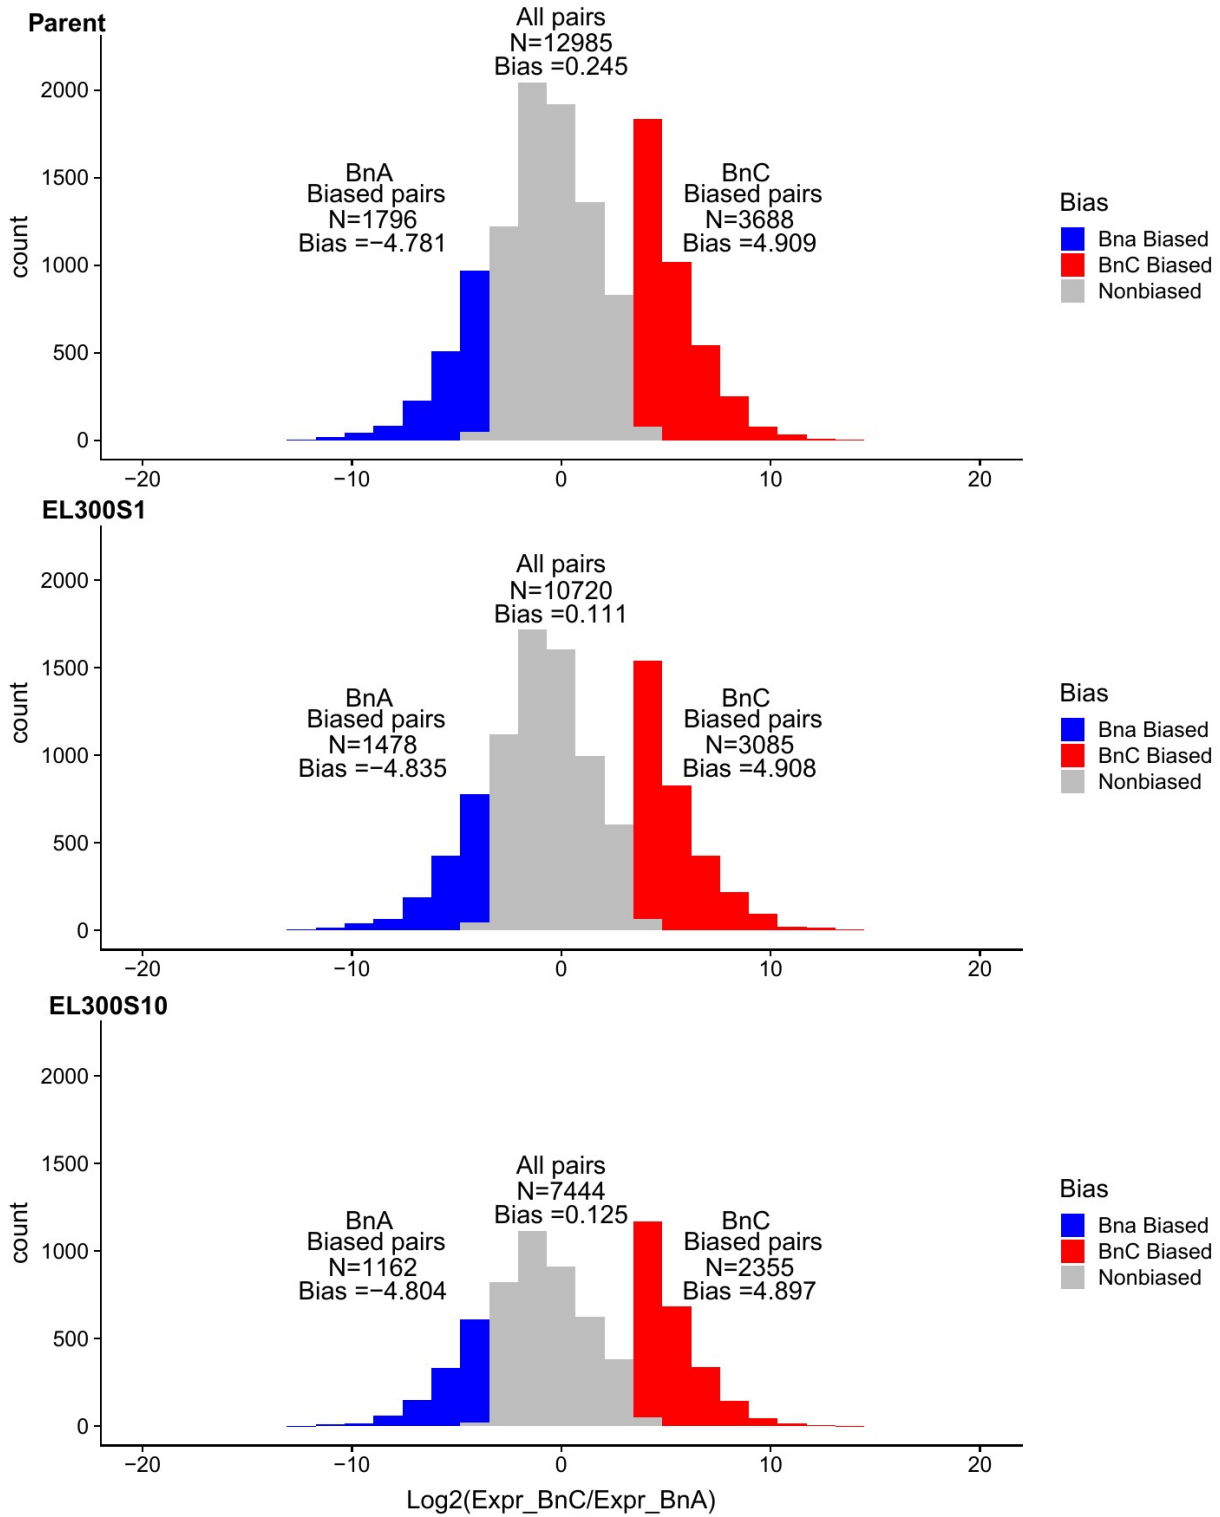

**Figure S3.**

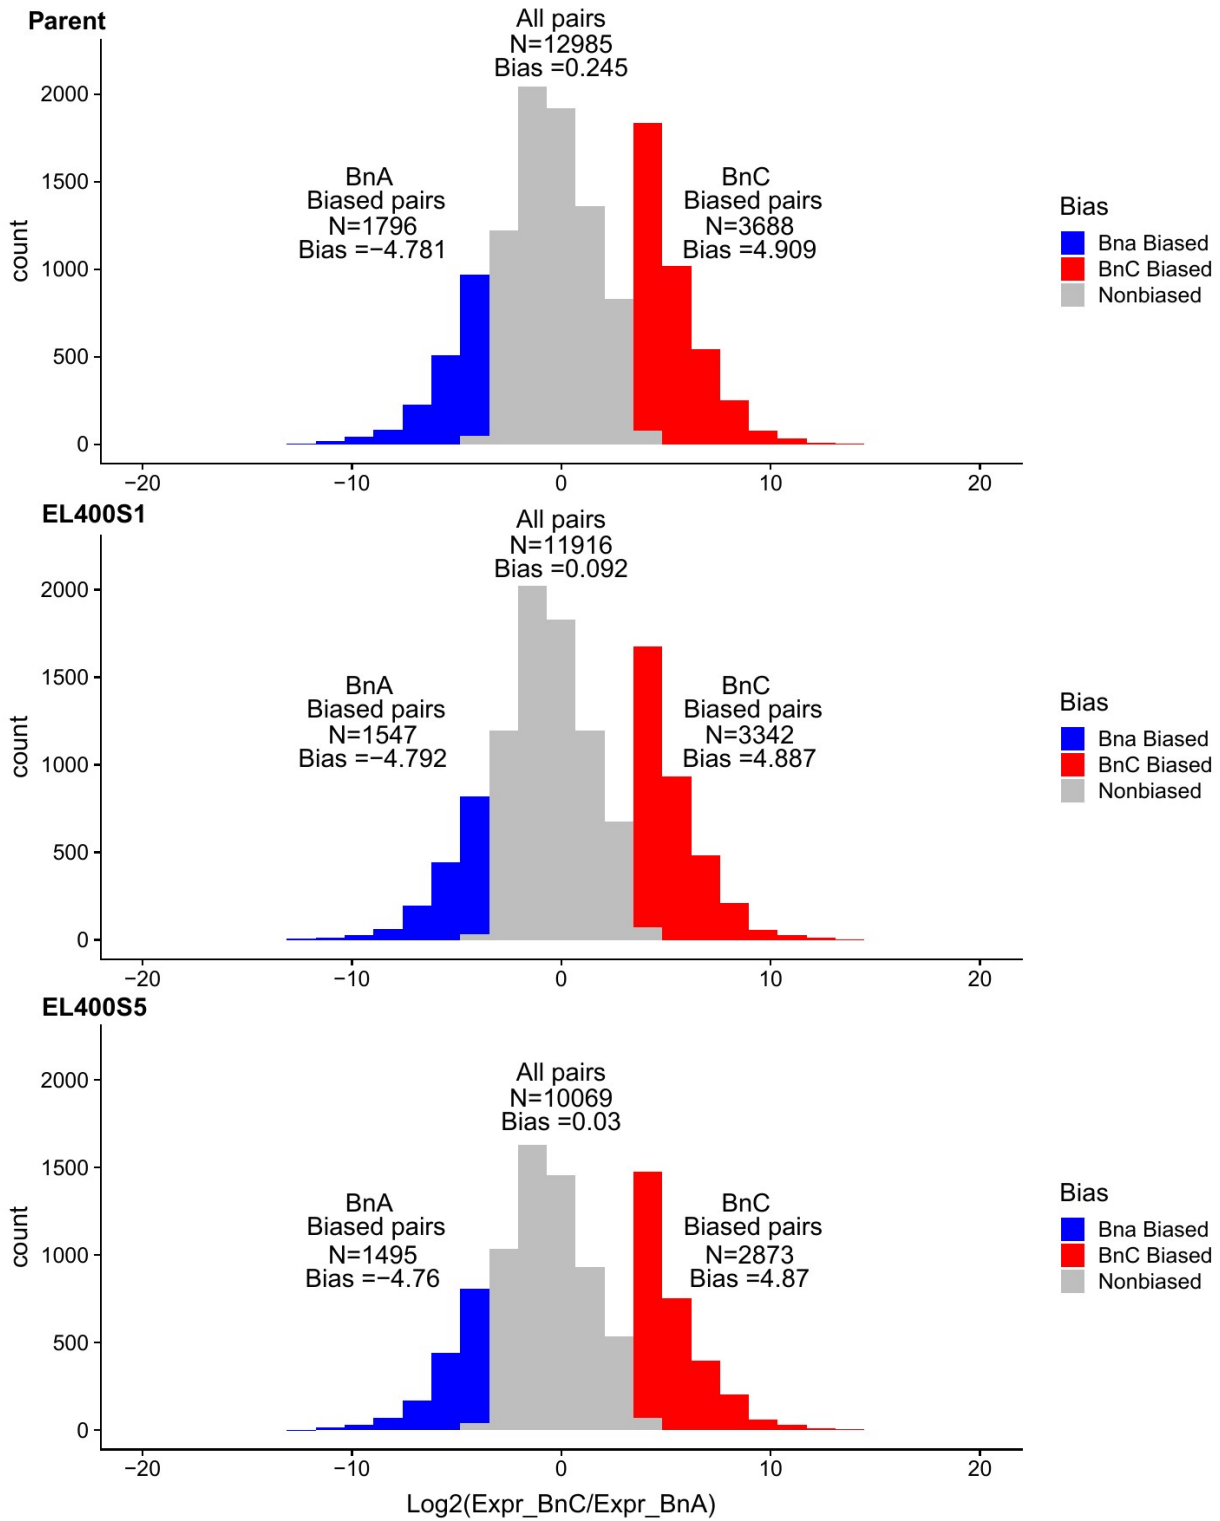

**Figure S4.**

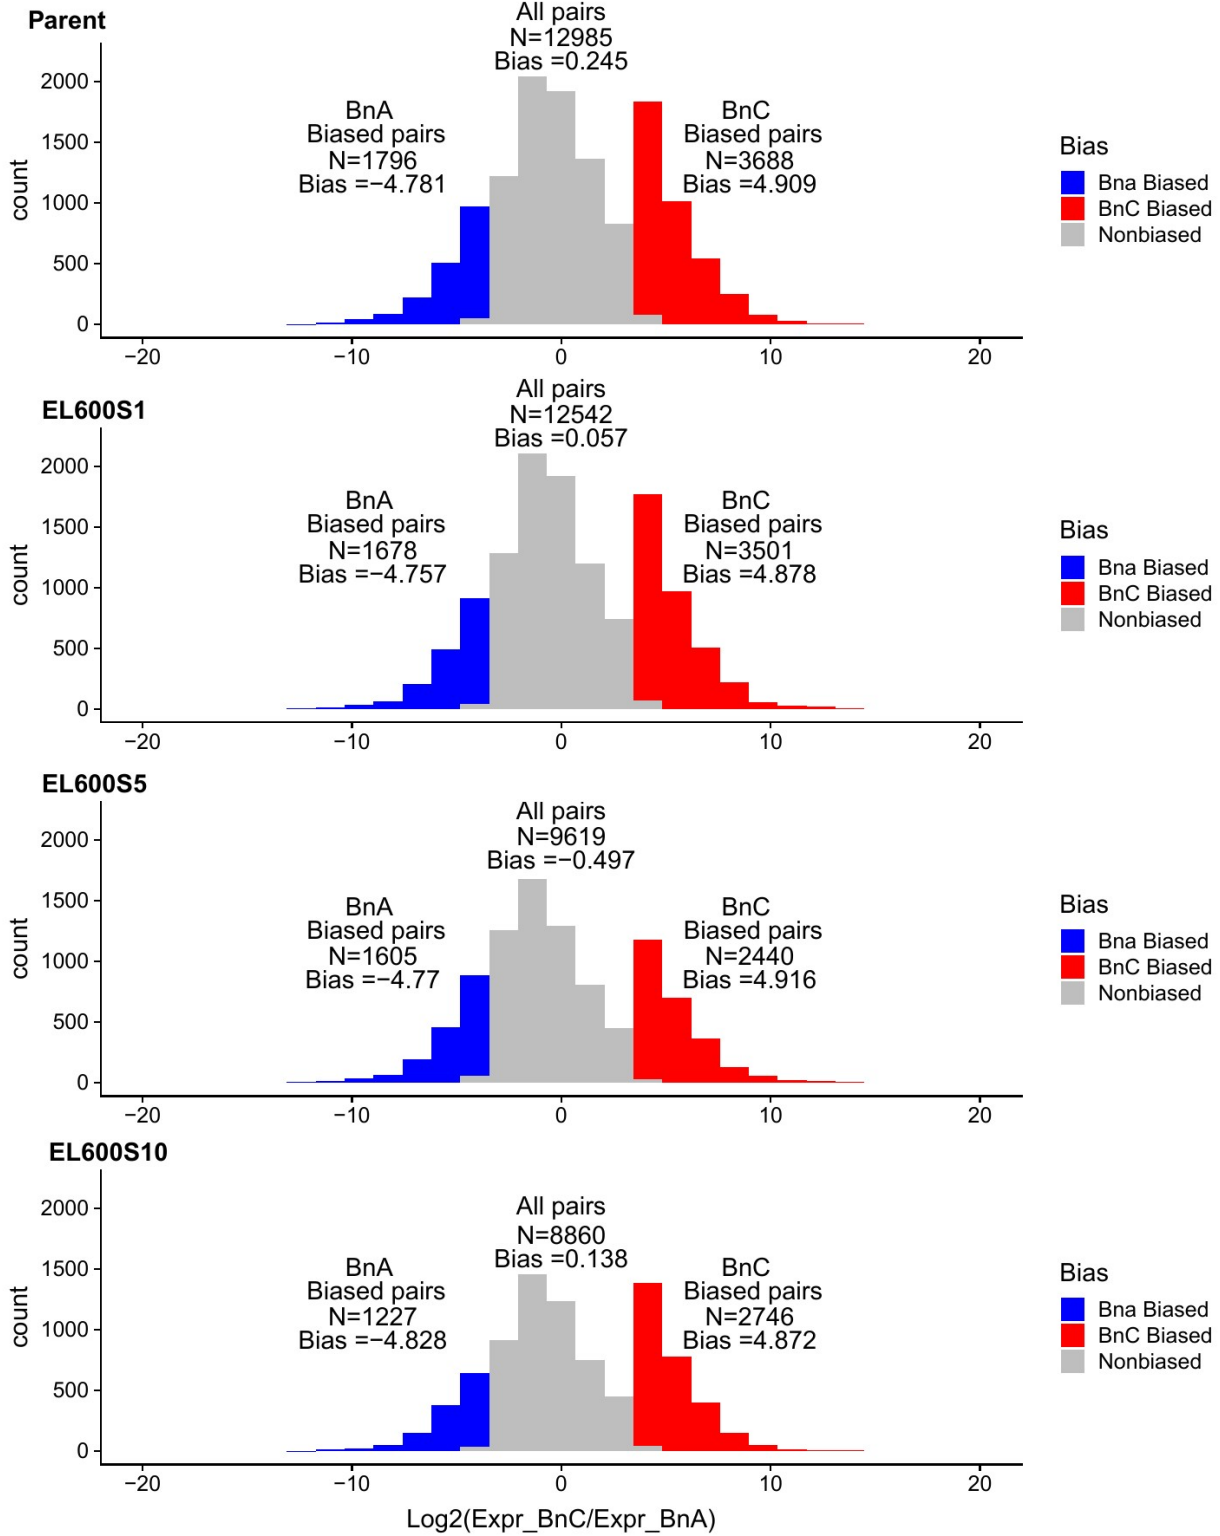

**Figure S5.**

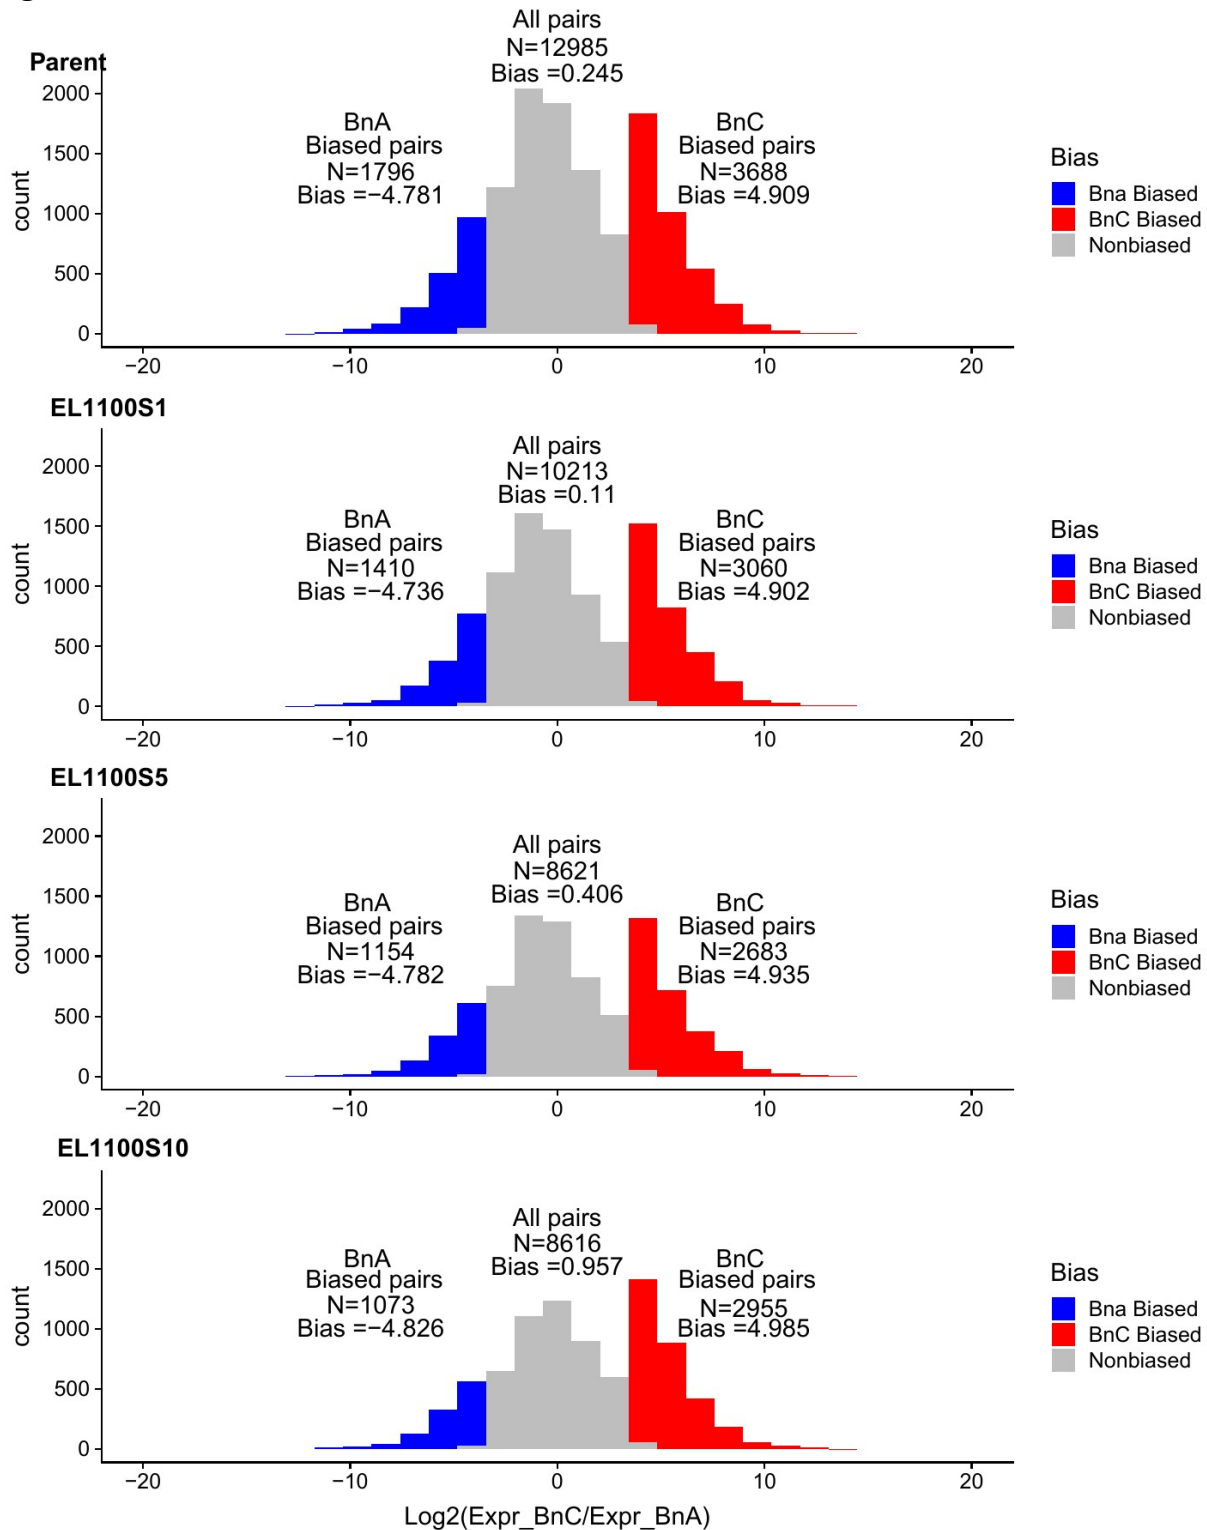

**Figures S1-S5** Distribution of homoeolog bias in the parent and three generations of line EL 200, EL 300, EL 400, EL 600, and EL 1100, red regions indicate BnC biased homoeologs with  $\text{log}_2$  expression foldchange greater than 3.5 and blue regions indicate BnA biased homoeologs with  $\text{log}_2$  expression foldchange less than -3.5.

**Figure S6**

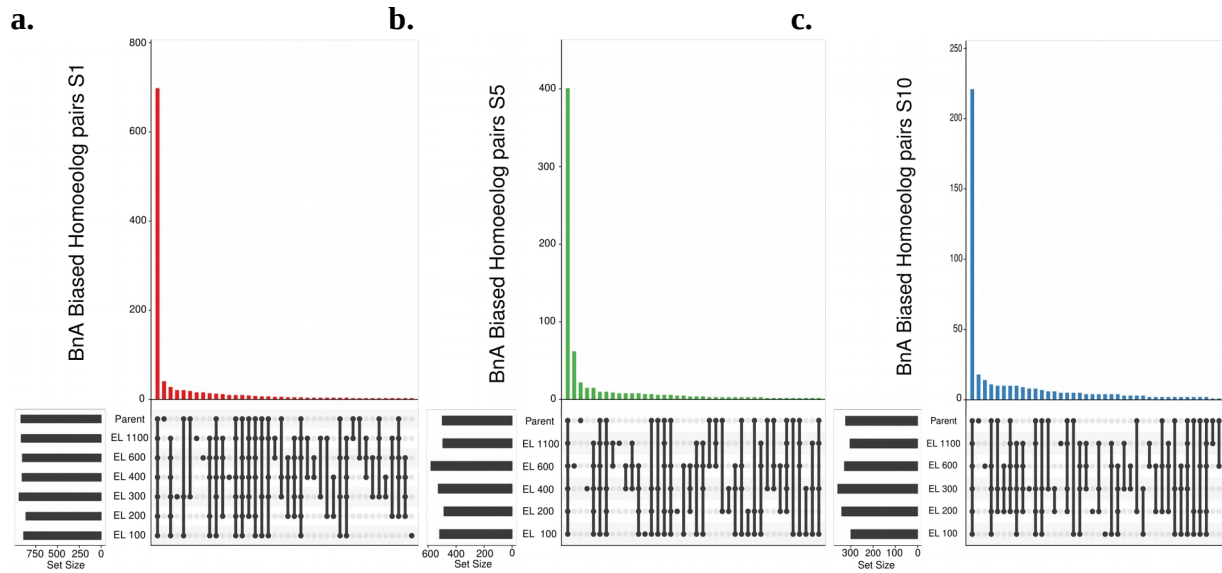

**Figure S6** Common shared biased Homoeolog pairs: Upset plot of how biased homoeologs pairs for BnA biased (**a-c**) are shared among all six lines for the three sampled generations. This analysis was restricted only to homoeolog pairs in 2:2 balance in all 6 lines.

**Figure S7**

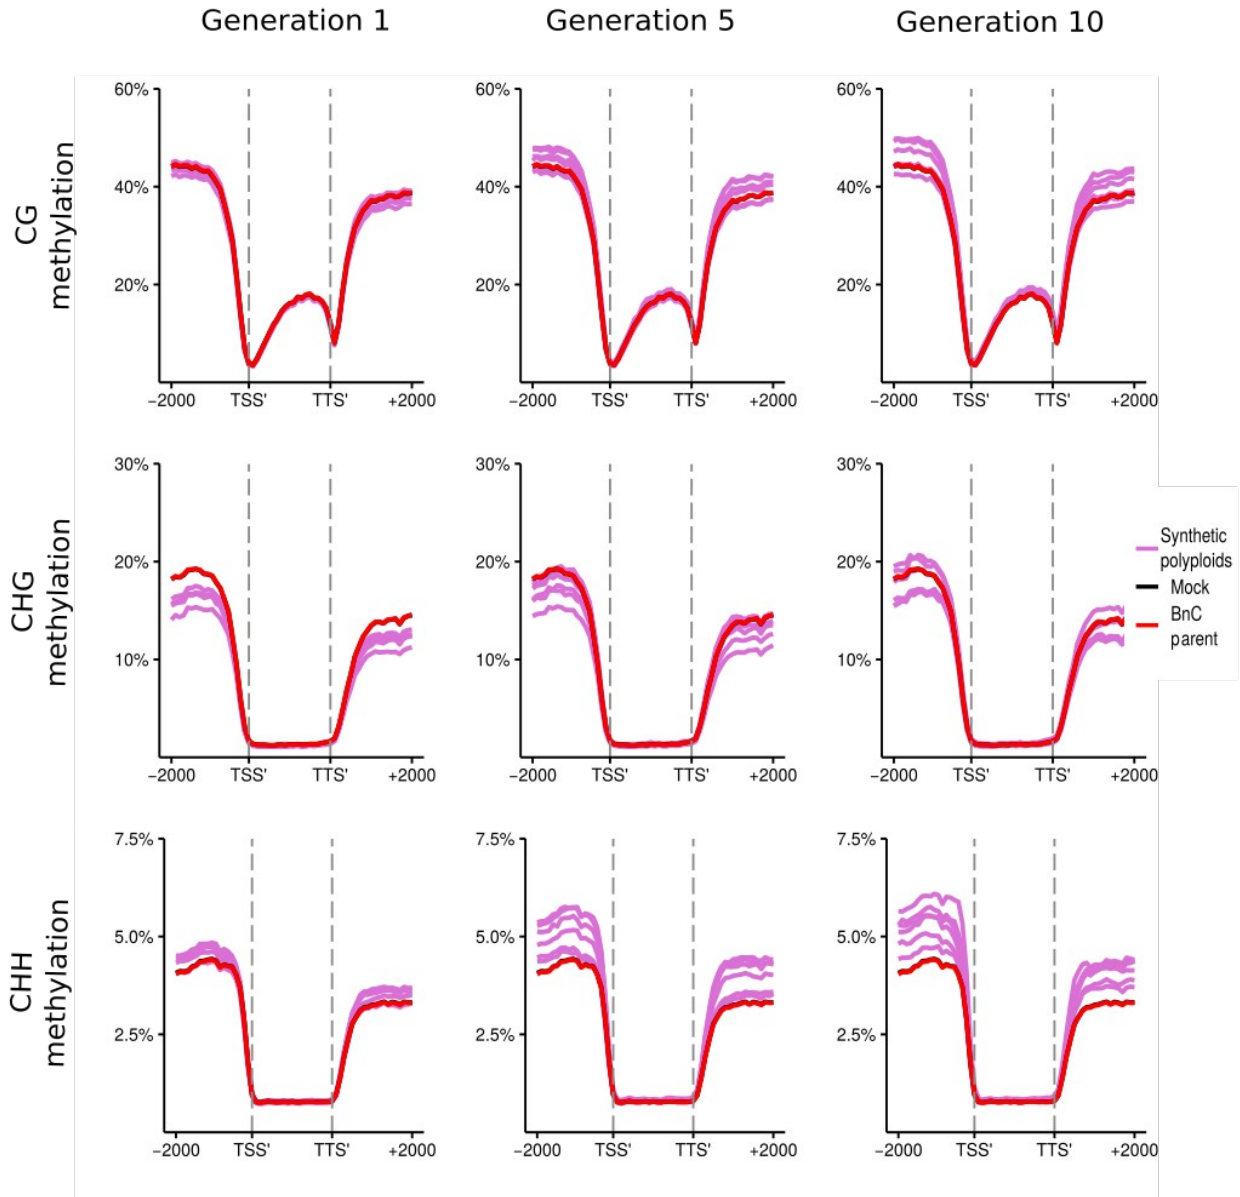

**Figure S7: DNA Methylation of BnC syntenic genes.**

Metaplots of CG, CHG, and CHH mean weighted methylation of syntenic on the BnC subgenome for generations one, five, and ten assessed using Bisulfite-seq. The six resynthesized lines are shown in purple, the *Brassica oleracea* progenitor is shown in red and *in silico* mock polyploid in black as a visual control for cross mapping errors. Methylation levels are shown for the transcription start site (TSS'), gene body, transcription termination site (TTS') and 2kb up- and downstream of the TSS and TTS.



**Figure S8**

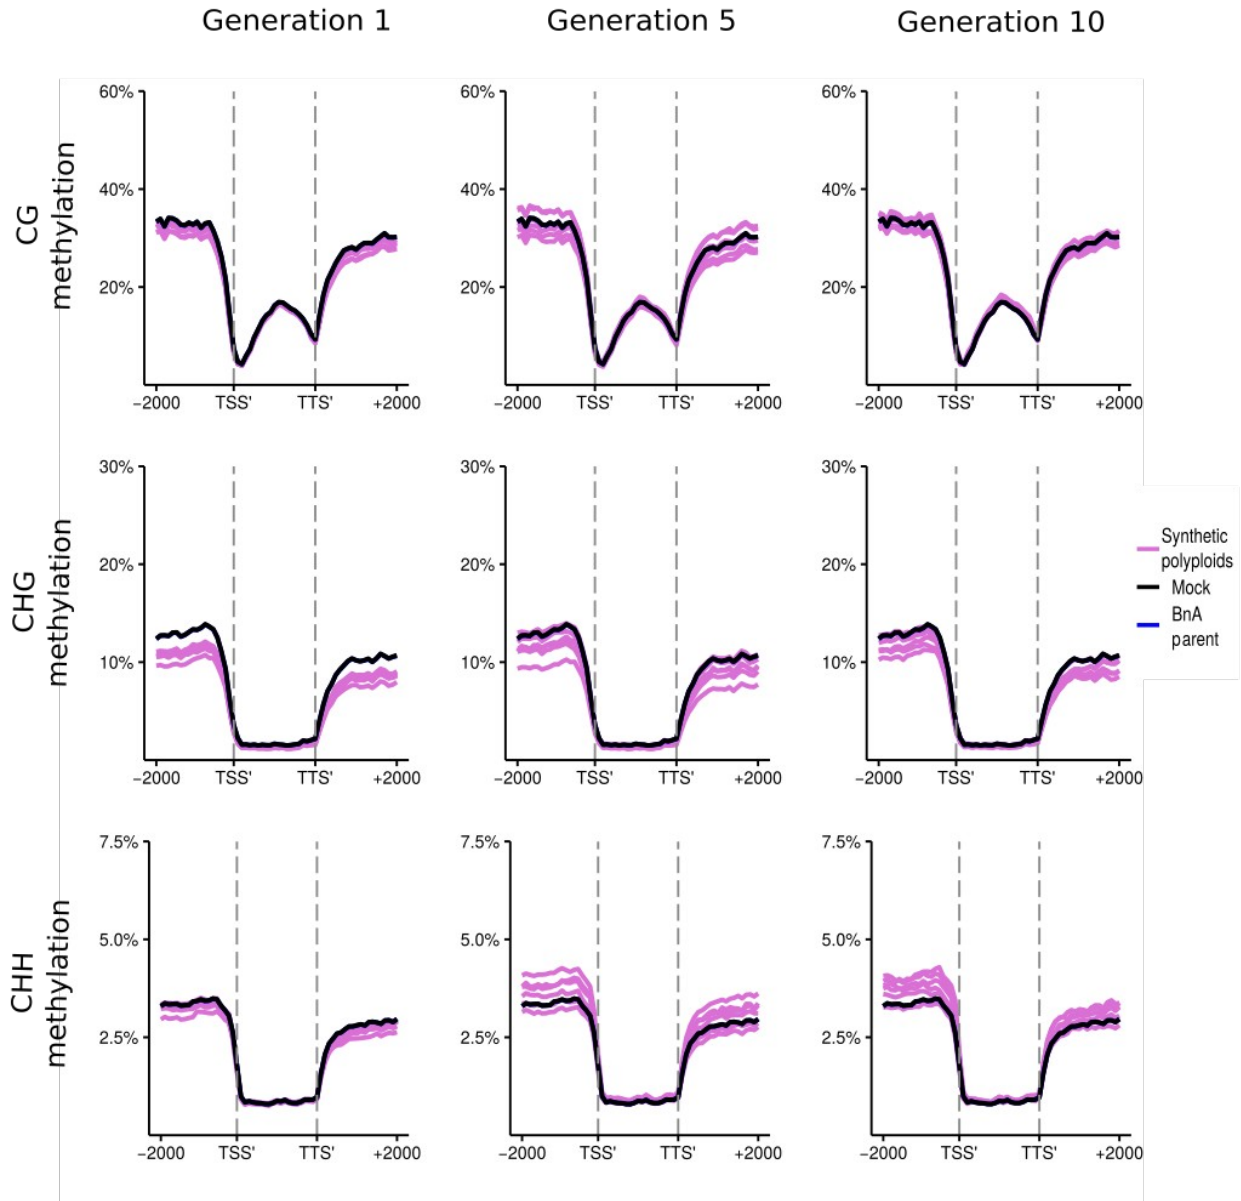

**Figure S8: DNA Methylation of BnA Syntenic Genes.**

Metaplots of CG, CHG, and CHH mean weighted methylation of all syntenic genes on the BnA subgenome for generations one, five, and ten assessed using Bisulfite-seq. The six resynthesized lines are shown in purple, the *Brassica rapa* progenitor is shown in blue and *in silico* mock polyploid in black as a visual control for cross mapping errors. Methylation levels are shown for the transcription start site (TSS'), gene body, transcription termination site (TTS') and 2kb up- and downstream of the TSS and TTS.

**Figure S9**

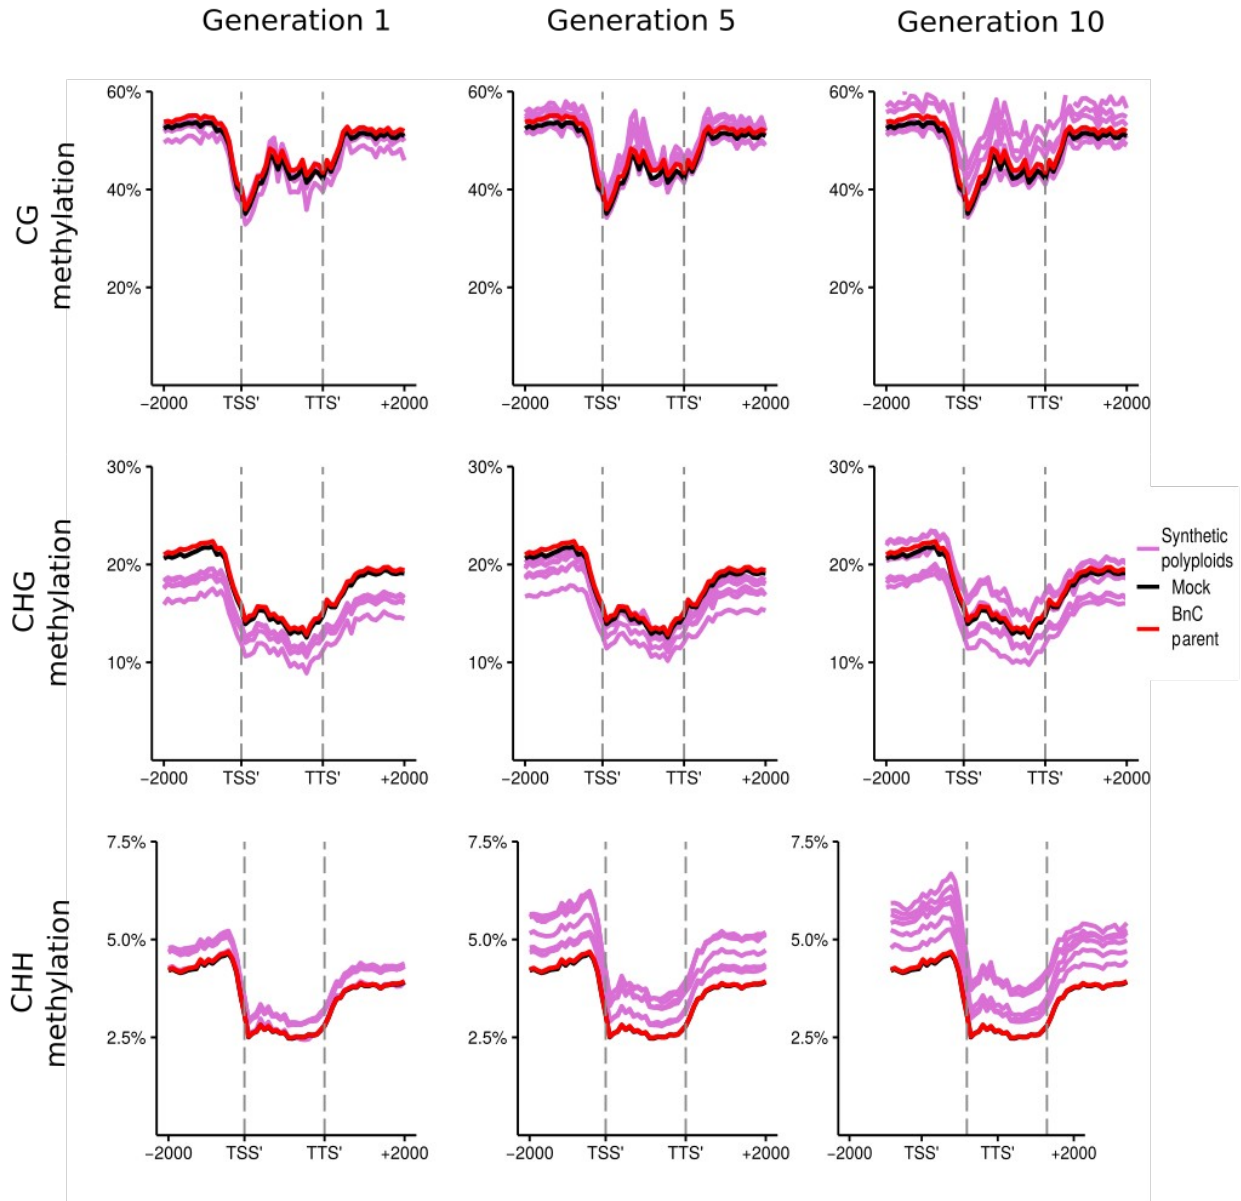

**Figure S9: DNA Methylation of BnC Non-Syntenic Genes.**

Metaplots of CG, CHG, and CHH mean weighted methylation of non-syntenic genes on the BnC subgenome for generations one, five, and ten assessed using Bisulfite-seq. The six resynthesized lines are shown in purple, the *Brassica oleracea* progenitor is shown in red and *in silico* mock polyploid in black as a visual control for cross mapping errors. Methylation levels are shown for the transcription start site (TSS'), gene body, transcription termination site (TTS') and 2kb up- and downstream of the TSS and TTS.

**Figure S10**

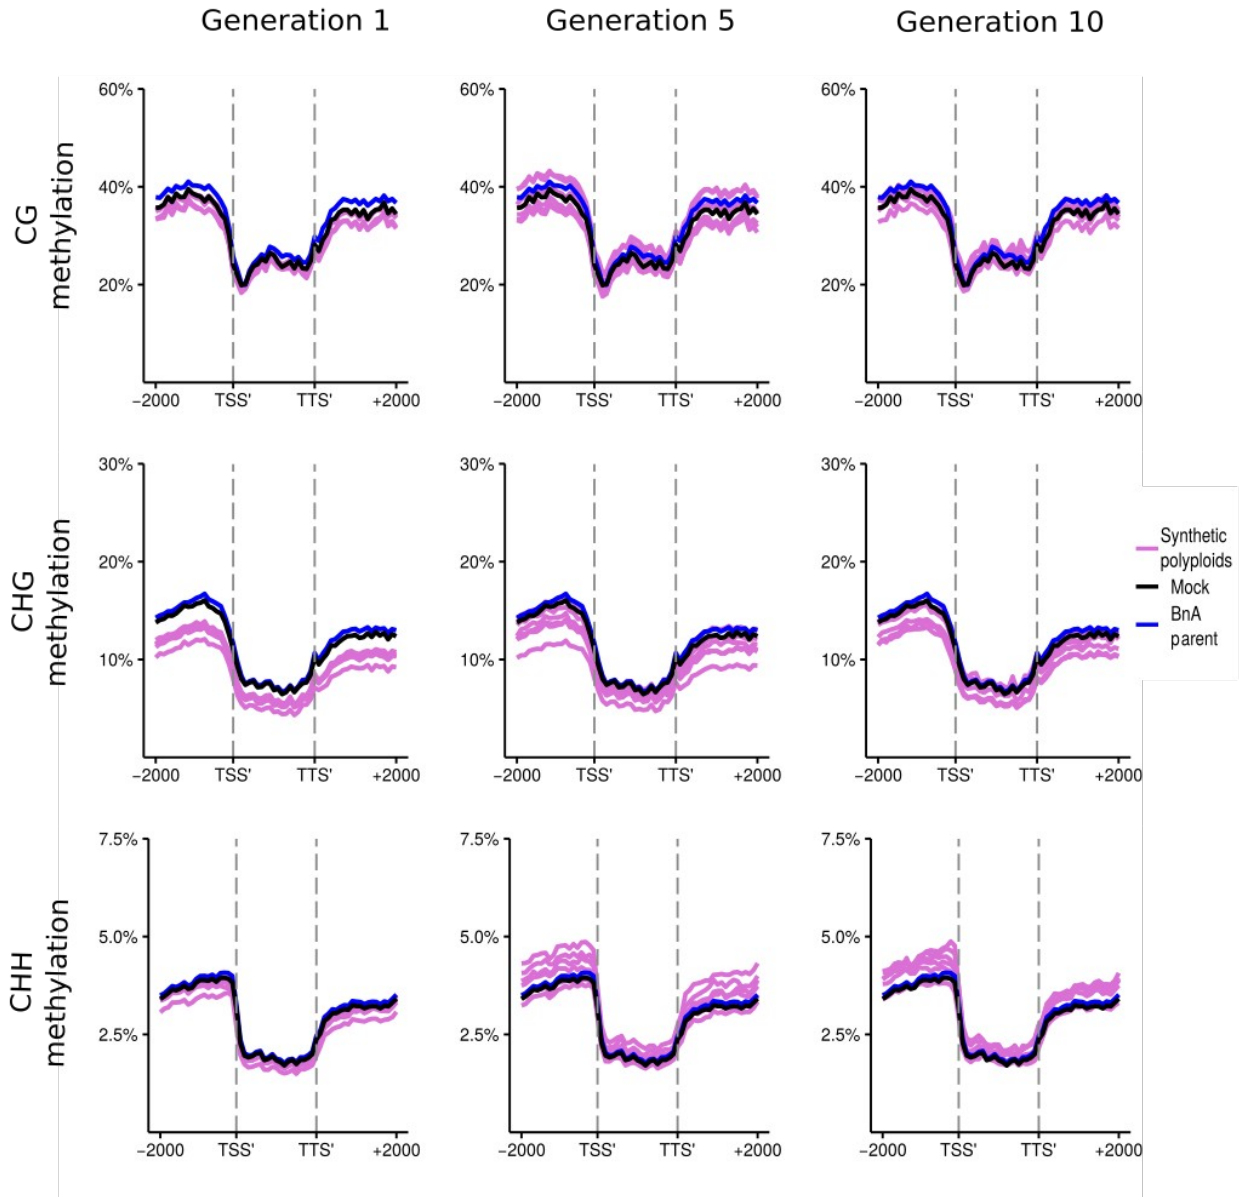

**Figure S10: DNA Methylation of BnA Non-Syntenic Genes.**

Metaplots of CG, CHG, and CHH mean weighted methylation of non-syntenic genes on the BnA subgenome for generations one, five, and ten assessed using Bisulfite-seq. The six resynthesized lines are shown in purple, the *Brassica rapa* progenitor is shown in blue and *in silico* mock polyploid in black as a visual control for cross mapping errors. Methylation levels are shown for the transcription start site (TSS'), gene body, transcription termination site (TTS') and 2kb up- and downstream of the TSS and TTS.

**Table S1:**

Homoeolog Expression Bias Chi Squared table

| Line    | BnC.<br>Observed | BnC.<br>Expected | BnA.<br>Observed | BnA.<br>Expected | Chi.Squared | P.value   |
|---------|------------------|------------------|------------------|------------------|-------------|-----------|
| 100S1   | 3051             | 2182             | 1313             | 2182             | 692.17      | 1.51e-152 |
| 100S5   | 2411             | 1746.5           | 1082             | 1746.5           | 505.65      | 5.60e-112 |
| 100S10  | 2407             | 1666.5           | 926              | 1666.5           | 658.07      | 3.92e-145 |
| 200S1   | 3138             | 2232.5           | 1327             | 2232.5           | 734.54      | 9.23e-162 |
| 200S5   | 2562             | 1903             | 1244             | 1903             | 456.42      | 2.90e-101 |
| 200S10  | 2302             | 1811             | 1320             | 1811             | 266.24      | 7.49e-60  |
| 300S1   | 3085             | 2281.5           | 1478             | 2281.5           | 565.95      | 4.26e-125 |
| 300S10  | 2355             | 1758.5           | 1162             | 1758.5           | 404.68      | 5.28e-90  |
| 400S1   | 3342             | 2444.5           | 1547             | 2444.5           | 659.04      | 2.42e-145 |
| 400S5   | 2873             | 2184             | 1495             | 2184             | 434.73      | 1.52e-96  |
| 600S1   | 3501             | 2589.5           | 1678             | 2589.5           | 641.69      | 1.43e-141 |
| 600S5   | 2440             | 2022.5           | 1605             | 2022.5           | 172.37      | 2.25e-39  |
| 600S10  | 2746             | 1986.5           | 1227             | 1986.5           | 580.76      | 2.56e-128 |
| 1100S1  | 3060             | 2235             | 1410             | 2235             | 609.06      | 1.79e-134 |
| 1100S5  | 2683             | 1918.5           | 1154             | 1918.5           | 609.29      | 1.60e-134 |
| 1100S10 | 2955             | 2014             | 1073             | 2014             | 879.33      | 3.06e-193 |
| Parent  | 3688             | 2742             | 1796             | 2742             | 652.75      | 5.65e-144 |

**Table S2**

Homoeolog Expression Bias vs Parent Chi Squared table

| Line    | BnC<br>Observed | BnC<br>Expected | BnA<br>Observed | BnA<br>Expected | Chi.Squared | P.value   |
|---------|-----------------|-----------------|-----------------|-----------------|-------------|-----------|
| 100S1   | 3051            | 2934.798        | 1313            | 1429.202        | 14.049      | 0.0002    |
| 100S5   | 2411            | 2349.049        | 1082            | 1143.951        | 4.9888      | 0.03      |
| 100S10  | 2407            | 2241.448        | 926             | 1091.552        | 37.336      | 9.94e-10  |
| 200S1   | 3138            | 3002.721        | 1327            | 1462.279        | 18.61       | 1.60e-05  |
| 200S5   | 2562            | 2559.542        | 1244            | 1246.458        | 0.0072085   | 0.9323    |
| 200S10  | 2302            | 2435.802        | 1320            | 1186.198        | 22.443      | 2.17e-06  |
| 300S1   | 3085            | 3068.626        | 1478            | 1494.374        | 0.26679     | 0.6055    |
| 300S10  | 2355            | 2365.189        | 1162            | 1151.811        | 0.13402     | 0.7143    |
| 400S1   | 3342            | 3287.861        | 1547            | 1601.139        | 2.722       | 0.09897   |
| 400S5   | 2873            | 2937.488        | 1495            | 1430.512        | 4.3229      | 0.0376    |
| 600S1   | 3501            | 3482.887        | 1678            | 1696.113        | 0.28763     | 0.5917    |
| 600S5   | 2440            | 2720.27         | 1605            | 1324.73         | 88.172      | < 2.2e-16 |
| 600S10  | 2746            | 2671.85         | 1227            | 1301.15         | 6.2836      | 0.01219   |
| 1100S1  | 3060            | 3006.083        | 1410            | 1463.917        | 2.9528      | 0.08573   |
| 1100S5  | 2683            | 2580.389        | 1154            | 1256.611        | 12.459      | 0.00042   |
| 1100S10 | 2955            | 2708.837        | 1073            | 1319.163        | 68.305      | < 2.2e-16 |
